# Supplementary material for: Experimental evidence for a universal threshold characterizing wave-induced sea ice break-up
Source: Copernicus journal article supplement (doi:10.5194/tc-2020-201), 2020-07-24
Supplement: Supplementary file [file tc-2020-201-RC2-supplement.pdf]

# REVIEW OF ‘EXPERIMENTAL EVIDENCE FOR A UNIVERSAL THRESHOLD CHARACTERIZING WAVE-INDUCED SEA ICE BREAK-UP’

VOERMANS ET AL

## 1. GENERAL COMMENTS

This is a very nice collection of observations and the main result of figure 8 is surprising, but convincing with quite a few events included that represent many different scales and seem to have been careful with uncertainties. I recommend publication with minor revisions. I have a small suggestion about the definition of the  $I_{br}$  threshold to make it more intuitive.

## 2. SPECIFIC COMMENTS

- (1) p3: section about  $I_{br}$  could be improved - I have never heard the term “similitude” or of the “Pi-theorem” before - can you think of a better name? Using  $ka$  (steepness) and  $kh$  instead of converting  $k$  to  $\lambda$  would get rid of many factors of  $2\pi$ , and  $I_{br}$  could become a stress relative to the flexural strength or a strain relative to the breaking strain for a beam. (The critical value would be about  $4\pi^2 \times 0.014 = .55$  I guess). Since the relationship looks like it could have some universality it is worth presenting it somewhat more intuitively.
- (2) “sheet as an elastic plate” — “sheet as a thin elastic plate” (or maybe simply an elastic beam, since you are using the  $\sigma = Y\varepsilon$  relation below).
- (3) p16: “infinitely thin ice sheet becomes numerically unbreakable” — the opposite problem is that the strain as  $kh \rightarrow \infty$  (shorter waves/thicker ice) also becomes infinite. In that case including reflection by ice edges is one way to reduce the strain inside the ice [1, 2]. Using the ice wavelength instead of the open water one could also make a difference here too. For both points the ice sheet example of Cathles et al jumps to mind.

## REFERENCES

- [1] Guillaume Boutin, Fabrice Ardhuin, Dany Dumont, Caroline Sévigny, Fanny Girard-Ardhuin, and Mickael Accensi. Floe size effect on wave-ice interactions: Possible effects, implementation in wave model, and evaluation. *Journal of Geophysical Research: Oceans*, 123(7):4779–4805, 2018.
- [2] T. D. Williams, L. G. Bennetts, V. A. Squire, D. Dumont, and L. Bertino. Wave-ice interactions in the marginal ice zone. Part 1: Theoretical foundations. *Ocean Modelling*, 71:81–91, 2013.
